# Supplementary material
Source: PubMed Central journal article supplement (PMC5896732)
Supplement: NIHMS76095-supplement-Supplementary_table_1.pdf [file NIHMS76095-supplement-Supplementary_table_1.pdf]

| Organism               | ZRS Forward (5') Primer | ZRS Reverse (3') Primer   |
|------------------------|-------------------------|---------------------------|
| <i>M. musculus</i>     | AGTTCAAGAAACCGCACACC    | GACAGCAACATCCTGACCAA      |
| <i>A. carolinensis</i> | GGCAGAGACAGACGTGATGA    | TGGCATGCTTTTCCTAGCTT      |
| <i>L. menadoensis</i>  | CAGCAAAGACCCCCAAATAG    | GGAAAAAGACATTTTTAGTGTCTCC |
| <i>O. latipes</i>      | ACTTTCTTCTGGTGTGGTC     | TCACCGCAGAAAGCTCATT       |
| <i>D. rerio</i>        | AACACGGGACAATTTTGAGC    | TTTCTGCTGCTGCATACAAAT     |
| <i>L. oculatus</i>     | GGTGCTTTCCTCATCTCTGC    | AGTGAAACAGGTGCCGTCTT      |
| <i>L. erinacea</i>     | ATGGATCATCAATGGGGAGA    | TTTGAGTTGACCATGCAAGC      |
| <i>P. marinus</i> (1)  | GTGATGTTGGTTGTCGTTGTG   | CTAAGTCACGTGGGAAAGCTG     |
| <i>P. marinus</i> (2)  | ACTTGGTCTTCTTGTGCTCCA   | CGAGGTCAAGTAGTGCCTCAC     |
| <i>B. lanceolatum</i>  | ATCGTGCTGAGGAAGGTGAC    | TGTGCCTCTACGCATTCAG       |

|                   | sZRS Forward (5') Primer | sZRS Reverse (3') Primer |
|-------------------|--------------------------|--------------------------|
| <i>D. rerio</i>   | TTTTTCATCAGCCTTCTGAACC   | CAAACCTGCAACCAACTG       |
| <i>H. sapiens</i> | TATGGTTTGCCTGTGTCCCC     | CCCCTTGGCCTCCTAAAGTG     |
| <i>O. latipes</i> | AGACAAGGTCGCTAGAAGTGC    | GTGTTTCAGCAGCACATCCAG    |

|                   | Other regions tested |                       |
|-------------------|----------------------|-----------------------|
|                   | Forward (5') Primer  | Reverse (3') Primer   |
| <i>O. latipes</i> | TGTTTTACCCGCAGATGCAG | TCACATTTTCGCAGCGATTGG |
| <i>O. latipes</i> | GGACATCACAGGTAGGGCTG | ATGCTGTACAGCTGTACACC  |

|                    | 4C-seq primers                     |                                  |
|--------------------|------------------------------------|----------------------------------|
|                    | Enzyme: DpnII                      | Enzyme: Csp6I                    |
| <i>M. musculus</i> | <i>Shh</i> CCAGTCTGGGTGGGGATC      | <i>Shh</i> CCTTATTTACACCCCATCCCC |
| <i>O. latipes</i>  | <i>Shh</i> CATCAAGACTTCAGGACTGGATC | <i>Shh</i> TTTTGCCTTCGTATCTGCCGC |
| <i>O. latipes</i>  | ZRS CTGGGAAAGGAGAGGAGGATC          | ZRS ACAATCCTTGAAACGGCGAG         |

|                          | CRISPR target sites             |                                 |
|--------------------------|---------------------------------|---------------------------------|
| <i>O. latipes</i> Δ401   | GGTGAGTAATCAATTAACG <b>AGG</b>  | GTCCAGCTGTATTACCATGC <b>AGG</b> |
| <i>O. latipes</i> Δ948   | GGCTTCAACATTAGCCAG <b>AGG</b>   | AGCTGTATTACCATGCAGG <b>AGG</b>  |
| <i>O. latipes</i> Δ3.4kb | GTCCAGCTGTATTACCATGC <b>AGG</b> | TGGCCTCTAACGAGCCACAC <b>GGG</b> |

|                             | Deletion screening primers |                           |
|-----------------------------|----------------------------|---------------------------|
|                             | Forward (5') Primer        | Reverse (3') Primer       |
| <i>O. latipes</i> Δ401/Δ948 | ATTTTAAAAAGCATCCACATTTCC3  | AAATGAAGTGTCTGGGTGTATCCT3 |
| <i>O. latipes</i> Δ3.4kb    | CACATCATCTGTGATTGGAATTTTA  | TTAAAAGCATGAATGAGTGTGAAAC |

|                               | Lamprey cloning primers |                      |
|-------------------------------|-------------------------|----------------------|
|                               | Forward (5') Primer     | Reverse (3') Primer  |
| <i>L. camtschaticum</i> MyHC1 | ACGTGCAGGGACAGATCAAG    | TCTCCAGCCTTGACAACACC |
| <i>L. camtschaticum</i> ColA  | CGATTCTACCGTGGCGATCA    | CCGAACTCCTGATCCACACC |

### Supplementary Table 1

Oligos used for PCR amplification of the ZRS and sZRS enhancer from different species. Also listed are primers used for the 4C-seq analyses, genomic deletion target sites (PAM sequence in bold), genomic deletions screening and lamprey cloning.
